# Supplementary material for: Carbon Stocks in Miombo Woodlands: Evidence From Over 50 Years
Source: Preprints.org preprint supplement (doi:10.20944/preprints202103.0029.v1), 2021-03-01
Supplement: Supplementary file 3 [file Table S1.xlsx]

## Sheet: study validity
		TABLE S1| Study validity													contextual social information			site information
ID	Publication year	Title	study type (qualitative/quantitative/mixed)	study length	1 = yes 0.5 = unclear 0 = no	Does the study compare relavant subject, exposures, comparators and outcomes of interest? If 0.5 or 0, exclude	Is the duration of the study adequate for the outcomes obtained?	Is the sample size clearly explained and adequate for the study?	Are the data collection methods clearly explained and replicable?	Is the qualitative or quantitative analysis clearly explained and replicable?	Are the results and conclusions logical derived from the data obtained?	Are confounding factors discussed and explained?	Assessment 1 6-7 = high quality 4-5 = medium below 4 = low	1 = yes 0.5 = unclear 0 = no	Is the historical context of the study presented?	Is the ecological context of the study presented?	Is the political context of the study presented?	Is information provided on the study site's soil?	Is information provided on the study site's climate?	Is seasonality taken into account?	Is vegetation of the site documented?	Assessment 2 7 - high 5-6 medium 4 below - low	overall rating 13-14 = high 9 - 12.5 = medium 6 - 8.5 = low 0 - 5.5 = very low (exclude)	Notes
4a	2016	Miombo woodland under threat: Consequences for tree diversity and carbon storage	quantitative	data collected over 5 months		1	1	1	1	1	1	0	5		1	1	0	0	1	1	1	5	10	medium
12a	2016	Mapping and estimating the total living biomass and carbon in low‑biomass woodlands using Landsat 8 CDR data	quantitative	data collected over 6 months		1	1	1	1	0.5	0.5	0.5	4.5		1	1	0	0	1	0	0	3	7.5	low	EXCLUDE, low quality
13a	2016	Participatory forest carbon assessment in south-eastern Tanzania: experiences, costs and implications for REDD+ initiatives	mixed	data over 4 years		1	1	1	1	1	1	0.5	5.5		1	1	1	0	1	0.5	1	5.5	11	medium
15a	2016	Impacts of Pine and Eucalyptus Plantations on Carbon and Nutrients Stocks and Fluxes in Miombo Forests Ecosystems	quantitative	data over 2 years		1	1	1	1	1	1	0.5	5.5		0.5	1	0.5	1	1	1	1	6	11.5	medium
22a	2017	Tree Species Diversity and Composition of Miombo Woodlands in South-Central Angola: A Chronosequence of Forest Recovery after Shifting Cultivation	quantitative	data over 1.5 years		1	1	1	1	1	1	0.5	5.5		0	1	0	1	1	0.5	1	4.5	10	medium
25a	2016	Increased Biomass for Carbon Stock in Participatory Forest Managed Miombo Woodlands of Tanzania	quantitative	data collected in 2012		1	1	1	1	1	1	0.5	5.5		0	1	1	0	1	0.5	0	3.5	9	medium
31a	2016	The relative importance of vertical soil nutrient heterogeneity, and mean and depth‑specific soil nutrient availabilities for tree species richness in tropical forests and woodlands	quantitative	data over 1 year		1	1	1	1	1	1	0	5		0	1	0	1	1	0	1	4	9	medium
33a	2018	Estimating Tree Crown Area and Aboveground Biomass in Miombo Woodlands From High-Resolution RGB-Only Imagery	quantitative	one month		1	1	1	1	1	1	0	5		0	1	0	0	1	1	1	4	9	medium
35a	2017	Above-ground carbon stock in a forest subjected to decadal frequent fires in western Tanzania	quantitative			1	0.5	1	1	1	1	0.5	5		0.5	1	0	0	1	0.5	1	4	9	medium
36a	2017	Feasibility of Community Management of Miombo Woodlands for Carbon Project in Southern Highlands of Tanzania	mixed	data collected in 2014		1	1	1	1	1	1	0.5	5.5		0.5	1	1	0	0	0	0	2.5	8	low	EXCLUDE, AGB, BGB data not clear
37a	2017	Modelling tree growth to determine the sustainability of current off-take from miombo woodland: a case study from rural villages in Malawi	mixed	2 months		1	1	1	1	1	1	0	5		0.5	1	0.5	0	0	0	0	2	7	low	EXCLUDE, low quality
38a	2017	Combining airborne laser scanning and Landsat data for statistical modeling of soil carbon and tree biomass in Tanzanian Miombo woodlands	quantitative	2 months		1	1	1	1	1	1	0.5	5.5		1	1	1	1	1	0.5	1	6.5	12	medium	EXCLUDE	data for mixed land use including woodland, grassland and cultivated land and study does not distinguish between them while estimating SOC
39a	2018	Estimating soil organic and aboveground woody carbon stock in a protected dry Miombo ecosystem, Zimbabwe: Landsat 8 OLI data applications	quantitative	unspecified		1	0.5	1	1	1	1	0	4.5		1	1	1	1	1	0.5	0	5.5	10	medium
40a	2016	The Potential of Selective Harvesting in Mitigating Biomass and Carbon Loss in Forest Co-management Block in Liwonde Forest Reserve, Malawi	quantitative	data over four years		1	1	1	1	1	1	0.5	5.5		1	1	1	1	1	0	0	5	10.5	medium
47a	2017	Going beyond the green: senesced vegetation material predicts basal area and biomass in remote sensing of tree cover conditions in an African tropical dry forest (miombo woodland) landscape	quantitative	1 month		1	1	1	1	1	1	0	5		1	1	1	0	1	1	0	5	10	medium
53a	2016	Diversity, Population Structure, and Above Ground Biomass in Woody Species on Ngomakurira Mountain, Domboshawa, Zimbabwe	quantitative	1 month		1	1	1	1	1	1	0	5		1	1	0.5	1	1	0.5	1	6	11	medium
66a	2016	Total tree, merchantable stem and branch volume models for miombo woodlands of Malawi	quantitative	unspecified		1	0.5	1	1	1	1	0	4.5		0.5	1	1	1	1	0	1	5.5	10	medium
87a	2016	Edge effects: impact of anthropogenic activities on vegetation structure and diversity in western Umfurudzi Park, Zimbabwe	mixed	3 months		1	1	1	1	1	1	0	5		0.5	1	0.5	0	1	0	1	4	9	medium
97a	2016	Mapping and estimating forest area and aboveground biomass in miombo woodlands in Tanzania using data from airborne laser scanning, TanDEM-X, RapidEye, and global forest maps: A comparison of estimated precision	quantitative	2 months		1	1	1	1	1	1	0.5	5.5		1	0.5	0.5	0	1	0	0	3	8.5	low	EXCLUDE, low quality
101a	2016	Impacts of land use change due to biofuel crops on climate regulation services: Five case studies in Malawi, Mozambique and Swaziland	quantitative	Data collected over a year in different months		1	1	1	1	1	1	0	5		1	1	1	1	0	0	0	4	9	medium
108a	2015	How resilient are African woodlands to disturbance from shifting cultivation?	quantitative	Over four decades (chronosequence)		1	1	1	1	1	1	0.5	5.5		1	1	0	1	1	0.5	1	5.5	11	medium
110a	2015	Modelling aboveground forest biomass using airborne laser scanner data in the miombo woodlands of Tanzania	quantitative	Data collected over three months		1	1	1	1	1	1	0	5		1	1	0	0	1	0	1	4	9	medium
112a	2013	Floristic composition, species diversity and carbon storage in charcoal and agriculture fallows and management implications in Miombo woodlands of Zambia	quantitative	data collected over 5 months		1	1	1	1	1	1	0.5	5.5		1	0.5	0.5	0	1	0	1	4	9.5	medium
113a	2011	Carbon storage, structure and composition of miombo woodlands in Tanzania’s Eastern Arc Mountains	quantitative	data measured once		1	0.5	1	1	1	1	1	5.5		1	1	0	1	1	0	1	5	10.5	medium
115a	2012	Participatory Forest Carbon Assessment and REDD+: Learning from Tanzania	quantitative	Data collected one time		1	1	1	1	1	1	0.5	5.5		1	0.5	1	0	0	0	1	3.5	9	medium
116a	2014	Biomass Equations for Tropical Forest Tree Species in Mozambique	quantitative	Data collected one time		1	0.5	1	1	1	1	0	4.5		0	1	0	1	1	0	1	4	8.5	low	EXCLUDE, low quality
117a	2009	Baseline carbon estimation in Dombe, Manica Biofuel production area Mozambique Principle Energy	quantitative			1	0.5	1	1	1	1	0	4.5		0	1	0	1	0	0	1	3	7.5	low	EXCLUDE, low quality
119a	2013	Land use and management effects on soil organic matter fractions in Rhodic Ferralsols and Haplic Arenosols in Bindura and Shamva districts of Zimbabwe	quantitative			1	0.5	1	1	1	1	0.5	5		0.5	1	0	1	0.5	1	0	4	9	medium
													0									0	0
													0									0	0
													0									0	0
