# Supplementary material for: Carbon Stocks in Miombo Woodlands: Evidence From Over 50 Years
Source: Preprints.org preprint supplement (doi:10.20944/preprints202103.0029.v1), 2021-03-01
Supplement: Supplementary file 4 [file Table S2.xlsx]

## Sheet: Sheet1
	Table S2| References from 2016-2018 literature review
#	Author and year	Year	Study ID	Journal
1	Katani et al.	2016	13a	Fauna & Flora International
2	Guedes	2016	15a	Licentiate Thesis; Swedish University of Agricultural Sciences Uppsala
3	Lusambo et al.	2016	25a	J Ecosys Ecograph
4	Mareya et al.	2018	33a	IEEE J. Sel. Top. Appl. Earth Obs. Remote Sens.
5	Mganga et al.	2017	35a	J. Bio. Env. Sci.
6	Dube et al.	2018	39a	Phys. Chem. Earth
7	Kamangadazi et al.	2016	40a	Sch. Acad. J. Biosci.
8	Mayes et al.	2017	47a	Environ. Res. Lett.
9	Zimudzi and Chapano	2016	53a	Int. J. Biodivers.
10	Muposhi et al.	2016	87a	Afr. J. Ecol.
11	Romeu-Dalmau et al.	2016	101a	Biomass and Bioenergy
12	McNicol et al.	2015	108a	Ecol. Appl.
13	Mauya et al.	2015	110a	Carbon Balanc. Manag.
14	Kalaba et al.	2013	112a	For. Ecol. Manage.
15	Shirima et al.	2011	113a	Afr. J. Ecol.
16	Mukama et al.	2012	115a	Int. J. For. Res.
17	Mujuru et al.	2013	119a	Geoderma
