# Supplementary material for: Carbon Stocks in Miombo Woodlands: Evidence From Over 50 Years
Source: Preprints.org preprint supplement (doi:10.20944/preprints202103.0029.v1), 2021-03-01
Supplement: Supplementary file 5 [file Table S3.xlsx]

## Sheet: Sheet1
	Table S3| Selected quantitative studies from the systematic evidence gap map by Gumbo et al. 2018
#	Author and year	Year	Study ID	Journal
1	Kutsch et al.	2011	1	Carbon Balance Mgmt
2	Kashindye et al.	2013	2	African J Environ Sci Technol.
3	Kuyah et al.	2014	5	Biomass and Bioenergy
4	Kwibisa	2000	22	MSc. Dissertation, University of Zambia, Zambia.
5	Sambane	2005	23	A dissertation presented for the degree of Master of Science, University of Edinburgh
6	Boaler and Sciwale	1966	28	J Ecol.
7	Strang	1974	29	J Appl Ecol.
8	Smith	1998	33	Bothalia.
9	Jew et al.	2015	36	For Ecol Manage.
10	Mapanda et al.	2010	41	Eur J Soil Sci.
11	Rossi et al.	2009	44	Catena.
12	Woollen et al.	2012	103	Ecosystems.
13	Winowiecki et al.	2015	138	Geoderma.
14	Chidumayo	2013	306	For Ecol Manage.
15	Ando et al.	2014	323	Soil Sci Plant Nutr.
16	Muposhi et al.	2014	331	J Anim Plant Sci.
17	Treue et al.	2014	367	Int For Rev.
18	Shirima et al.	2015	1527	Basic Appl Ecol.
19	Ryan and Williams	2011	1591	Ecol Appl.
20	Ryan et al.	2011	1742	Biotropica.
21	Williams et al.	2008	2940	For Ecol Manage
22	Walker & Desanker	2004	3979	For Ecol Manage
23	Chamshama et al.	2004	4214	South African For Journal
24	Chidumayo	1997	5287	Commonw For Rev.
25	Grundy et al.	1993	5723	For Ecol Manage.
26	Chidumayo	1988	5922	J Trop Ecol.
27	Chidumayo	1987	5982	For Ecol Manage.
28	Chidumayo	1987	5983	Biol Conserv.
29	Guy	1981	7174	J Appl Ecol.
30	Chidumayo	1991	8107	Bioresour Technol.
31	Chidumayo	1989	8128	J Ecol.
32	Shelukindo et al.	2014	9646	Int J Agric Policy Res.
33	Ando et al.	2014	9659	Agric Ecosyst Environ.
34	Sawe et al.	2014	9721	J Biodivers Conserv.
35	Chomba et al.	2013	9762	Open J Ecol.
36	Mbwambo et al.	2012	9938	For Trees Livelihoods.
37	Hofstad & Araya	2015	10620	For Policy Econ.
38	Jenkinson et al.	1999	16864	Ecology
39	Stromgaard	1985	17736	For Ecol Manage.
