# Supplementary material for: Carbon Stocks in Miombo Woodlands: Evidence From Over 50 Years
Source: Preprints.org preprint supplement (doi:10.20944/preprints202103.0029.v1), 2021-03-01
Supplement: Supplementary file 6 [file Table S4.xlsx]

## Sheet: Sheet1
Table S4| Literature review reference list
Study ID	Reference
9659	Ando, K.; Shinjo, H.; Kuramitsu, H.; Miura, R.; Sokotela, S.; Funakawa, S. Effects of cropping and short-natural fallow rotation on soil organic carbon in the Eastern Province of Zambia. Agriculture, Ecosystems & Environment 2014, 196, 34–41, doi:10.1016/j.agee.2014.06.012.
323	Ando, K.; Shinjo, H.; Noro, Y.; Takenaka, S.; Miura, R.; Sokotela, S.B.; Funakawa, S. Short-term effects of fire intensity on soil organic matter and nutrient release after slash-and-burn in Eastern Province, Zambia. Soil Science and Plant Nutrition 2014, 60, 173–182, doi:10.1080/00380768.2014.883487.
28	Boaler, S.B.; Sciwale, K.C. Ecology of a Miombo Site, Lupa North Forest Reserve, Tanzania: III. Effects on the Vegetation of Local Cultivation Practices. J Ecol 1966, 54, 577, doi:10.2307/2257803.
4214	Chamshama, S.A.O.; Mugasha, A.G.; Zahabu, E. Stand biomass and volume estimation for Miombo woodlands at Kitulangalo, Morogoro, Tanzania : research note. Southern African Forestry Journal 2004, 200, 59–70.
5982	Chidumayo, E.N. A survey of wood stocks for charcoal production in the Miombo woodlands of Zambia. Forest Ecology and Management 1987, 20, 105–115, doi:10.1016/0378-1127(87)90153-8.
5983	Chidumayo, E.N. Woodland structure, destruction and conservation in the Copperbelt area of Zambia. Biological Conservation 1987, 40, 89–100, doi:10.1016/0006-3207(87)90060-7.
5922	Chidumayo, E.N. A re-assessment of effects of fire on miombo regeneration in the Zambian Copperbelt. J. Trop. Ecol. 1988, 4, 361–372, doi:10.1017/S0266467400003011.
8128	Chidumayo, E.N. Early Post-Felling Response of Marquesia Woodland to Burning in the Zambian Copperbelt. J Ecol 1989, 77, 430, doi:10.2307/2260759.
8107	Chidumayo, E.N. Woody biomass structure and utilisation for charcoal production in a Zambian Miombo woodland. Bioresource Technology 1991, 37, 43–52, doi:10.1016/0960-8524(91)90110-6.
5287	Chidumayo, E.N. Effects of accidental and prescribed fires on miombo woodland, Zambia. The Commonwealth Forestry Review 1997, 76, 268–272.
306	Chidumayo, E.N. Forest degradation and recovery in a miombo woodland landscape in Zambia: 22 years of observations on permanent sample plots. Forest Ecology and Management 2013, 291, 154–161, doi:10.1016/j.foreco.2012.11.031.
9762	Chomba, C.; Nyirenda, V.; Silengo, M. Selective use patterns of woody plant species by local communities in Mumbwa Game Management Area: A prerequisite for effective management of woodland resources and benefit sharing. Open Journal of Ecology 2013, 3, 532–550.
39a	Dube, T.; Muchena, R.; Masocha, M.; Shoko, C. Estimating soil organic and aboveground woody carbon stock in a protected dry Miombo ecosystem, Zimbabwe: Landsat 8 OLI data applications. Physics and Chemistry of the Earth, Parts A/B/C 2018, 105, 154–160, doi:10.1016/j.pce.2018.03.007.
5723	Grundy, I.M.; Campbell, B.M.; Balebereho, S.; Cunliffe, R.; Tafangenyasha, C.; Fergusson, R.; Parry, D. Availability and use of trees in Mutanda Resettlement Area, Zimbabwe. Forest Ecology and Management 1993, 56, 243–266, doi:10.1016/0378-1127(93)90116-5.
15a	Guedes, B. Impacts of Pine and Eucalyptus Plantations on Carbon and Nutrients Stocks and Fluxes in Miombo Forests Ecosystems. Licentiate Thesis; Swedish University of Agricultural Sciences, Uppsala, 2016.
7174	Guy, P.R. Changes in the Biomass and Productivity of Woodlands in the Sengwa Wildlife Research Area, Zimbabwe. J Appl Ecol 1981, 18, 507, doi:10.2307/2402412.
10620	Hofstad, O.; Araya, M.M. Optimal wood harvest in miombo woodland considering REDD+payments — A case study at Kitulangalo Forest Reserve, Tanzania. Forest Policy and Economics 2015, 51, 9–16.
16864	Jenkinson, D.S.; Meredith, J.; Kinyamario, J.I.; Warren, G.P.; Wong, M.T.F.; Harkness, D.D.; Bol, R.; Coleman, K. ESTIMATING NET PRIMARY PRODUCTION FROM MEASUREMENTS MADE ON SOIL ORGANIC MATTER. Ecology 1999, 80, 2762–2773, doi:10.1890/0012-9658(1999)080[2762:ENPPFM]2.0.CO;2.
36	Jew, E.K.K.; Dougill, A.J.; Sallu, S.M.; O’Connell, J.; Benton, T.G. Miombo woodland under threat: Consequences for tree diversity and carbon storage. Forest Ecology and Management 2016, 361, 144–153, doi:10.1016/j.foreco.2015.11.011.
112a	Kalaba, F.K.; Quinn, C.H.; Dougill, A.J.; Vinya, R. Floristic composition, species diversity and carbon storage in charcoal and agriculture fallows and management implications in Miombo woodlands of Zambia. Forest Ecology and Management 2013, 304, 99–109, doi:10.1016/j.foreco.2013.04.024.
40a	Kamangadazi, F.; Mwabumba, L.; Missanjo, E. The Potential of Selective Harvesting in Mitigating Biomass and Carbon Loss in Forest Co-management Block in Liwonde Forest Reserve, Malawi. Scholars Academic Journal of Biosciences (SAJB) 2016, 4, 716–721.
2	Kashindye, A.; Mtalo, E.; Mpanda, M.M.; Liwa, E.; Giliba, R. Multi-temporal assessment of forest cover, stocking parameters and above-ground tree biomass dynamics in Miombo Woodlands of Tanzania. African Journal of Environmental Science and Technology 2013, 7, 611–623.
13a	Katani, J.Z.; Mustalahti, I.; Mukama, K.; Zahabu, E. Participatory forest carbon assessment in south-eastern Tanzania: experiences, costs and implications for REDD+ initiatives. Oryx 2016, 50, 523–532, doi:10.1017/S0030605315000174.
1	Kutsch, W.L.; Merbold, L.; Ziegler, W.; Mukelabai, M.M.; Muchinda, M.; Kolle, O.; Scholes, R.J. The charcoal trap: Miombo forests and the energy needs of people. Carbon Balance Manag. 2011, 6, doi:10.1186/1750-0680-6-5.
5	Kuyah, S.; Sileshi, G.W.; Njoloma, J.; Mng'omba, S.; Neufeldt, H. Estimating aboveground tree biomass in three different miombo woodlands and associated land use systems in Malawi. Biomass and Bioenergy 2014, 66, 214–222, doi:10.1016/j.biombioe.2014.02.005.
22	Kwibisa, L. The effects of indigenous cultivation practices on the recovery of dry miombo woodlands in Central Zambia. MSc. Dissertation; University of Zambia, Zambia, 2000.
25a	Lusambo, L.P.; Lupala, Z.J.; Ngaga, Y.M.; Kessy, J.F.; Abdallah, J.M.; Kingazi, S.P.; Mombo, F.; Nyamoga, G.Z. Increased Biomass for Carbon Stock in Participatory Forest Managed Miombo Woodlands of Tanzania. J Ecosyst Ecogr 2016, 6, doi:10.4172/2157-7625.1000182.
41	Mapanda, F.; Mupini, J.; Wuta, M.; Nyamangara, J.; Rees, R.M. A cross-ecosystem assessment of the effects of land cover and land use on soil emission of selected greenhouse gases and related soil properties in Zimbabwe. European Journal of Soil Science 2010, 61, 721–733, doi:10.1111/j.1365-2389.2010.01266.x.
33a	Mareya, H.T.; Tagwireyi, P.; Ndaimani, H.; Gara, T.W.; Gwenzi, D. Estimating Tree Crown Area and Aboveground Biomass in Miombo Woodlands From High-Resolution RGB-Only Imagery. IEEE J. Sel. Top. Appl. Earth Observations Remote Sensing 2018, 11, 868–875, doi:10.1109/JSTARS.2018.2799386.
110a	Mauya, E.W.; Ene, L.T.; Bollandsås, O.M.; Gobakken, T.; Næsset, E.; Malimbwi, R.E.; Zahabu, E. Modelling aboveground forest biomass using airborne laser scanner data in the miombo woodlands of Tanzania. Carbon Balance Manag. 2015, 10, doi:10.1186/s13021-015-0037-2.
47a	Mayes, M.; Mustard, J.; Melillo, J.; Neill, C.; Nyadzi, G. Going beyond the green: senesced vegetation material predicts basal area and biomass in remote sensing of tree cover conditions in an African tropical dry forest (miombo woodland) landscape. Environ. Res. Lett. 2017, 12, doi:10.1088/1748-9326/aa7242.
9938	Mbwambo, L.; Eid, T.; Malimbwi, R.E.; Zahabu, E.; Kajembe, G.C.; Luoga, E. Impact of decentralised forest management on forest resource conditions in Tanzania. Forests, Trees and Livelihoods 2012, 21, 97–113, doi:10.1080/14728028.2012.698583.
108a	McNicol, I.M.; Ryan, C.M.; Williams, M. How resilient are African woodlands to disturbance from shifting cultivation? Ecological Applications 2015, 25, 2320–2336.
35a	Mganga, N.D.; Lyaruu, H.V.M. Plant Species Diversity in Western Tanzania: Comparison between Frequently Burnt and Fire Suppressed Forests. Int. J. Pure App. Biosci. 2016, 4, 28–44, doi:10.18782/2320-7051.2306.
119a	Mujuru, L.; Mureva, A.; Velthorst, E.J.; Hoosbeek, M.R. Land use and management effects on soil organic matter fractions in Rhodic Ferralsols and Haplic Arenosols in Bindura and Shamva districts of Zimbabwe. Geoderma 2013, 209-210, 262–272, doi:10.1016/j.geoderma.2013.06.025.
115a	Mukama, K.; Mustalahti, I.; Zahabu, E. Participatory Forest Carbon Assessment and REDD+: Learning from Tanzania. International Journal of Forestry Research 2012, 2012, 1–14, doi:10.1155/2012/126454.
331	Muposhi, V.K.; Ndlovu, M.; Gandiwa, E.; Muvengwi, J.; Muboko, N. Vegetation dynamics prior to wildlife reintroductions in southern umfurudzi park, Zimbabwe. J. Anim. Plant Sci., 2014, 24, 1680–1690.
87a	Muposhi, V.K.; Chademana, T.C.; Gandiwa, E.; Muboko, N. Edge effects: impact of anthropogenic activities on vegetation structure and diversity in western Umfurudzi Park, Zimbabwe. Afr. J. Ecol. 2016, 54, 450–459.
101a	Romeu-Dalmau, C.; Gasparatos, A.; Maltitz, G. von; Graham, A.; Almagro-Garcia, J.; Wilebore, B.; Willis, K.J. Impacts of land use change due to biofuel crops on climate regulation services: Five case studies in Malawi, Mozambique and Swaziland. Biomass and Bioenergy 2018, 114, 30–40, doi:10.1016/j.biombioe.2016.05.011.
44	Rossi, J.; Govaerts, A.; Vos, B. de; Verbist, B.; Vervoort, A.; Poesen, J.; Muys, B.; Deckers, J. Spatial structures of soil organic carbon in tropical forests—A case study of Southeastern Tanzania. CATENA 2009, 77, 19–27, doi:10.1016/j.catena.2008.12.003.
1742	Ryan, C.M.; Williams, M.; Grace, J. Above- and belowground carbon stocks in a Miombo wooodland landscape of Mozambique. Biotropica 2011, 43, 423–432.
1591	Ryan, C.M.; Williams, M. How does fire intensity and frequency affect miombo woodland tree populations and biomass? Ecol. Appl. 2011, 21, 48–60, doi:10.1890/09-1489.1.
23	Sambane, E. Above-ground biomass accumulation in fallow fields at the Nhambita community – Mozambique. MSc. Dissertation; University of Edinburgh, UK, 2005.
9721	Sawe, T.C.; Munishi, P.K.T.; Maliondo, S.M. Woodlands degradation in the Southern Highlands, Miombo of Tanzania: Implications on conservation and carbon stocks. Int. J. Biodivers. Conserv. 2014, 6, 230–237, doi:10.5897/IJBC2013.0671.
9646	Shelukindo, H.B.; Semu, E.; Msanya, B.M.; Singh, B.R.; Munishi, P.K.t. Soil organic carbon stocks in the dominant soils of the Miombo woodland ecosystem of Kitonga Forest Reserve, Iringa, Tanzania. Int. J. Agric. Policy Res., 2014, 2, 167–177.
113a	Shirima, D.D.; Munishi, P.K.t.; Lewis, S.L.; Burgess, N.D.; Marshall, A.R.; Balmford, A.; Swetnam, R.D.; Zahabu, E.M. Carbon storage, structure and composition of miombo woodlands in Tanzania’s Eastern Arc Mountains. African Journal of Ecology 2011, 49, 332–342.
1527	Shirima, D.D.; Totland, Ø.; Munishi, P.K.T.; Moe, S.R. Relationships between tree species richness, evenness and aboveground carbon storage in montane forests and miombo woodlands of Tanzania. Basic and Applied Ecology 2015, 16, 239–249, doi:10.1016/j.baae.2014.11.008.
33	Smith, P.P. A reconnaissance survey of the vegetation of the North Luangwa National Park, Zambia. Bothalia 1998, 28, 197–211.
29	Strang, R.M. Some Man-Made Changes in Successional Trends on the Rhodesian Highveld. J Appl Ecol 1974, 11, 249–263, doi:10.2307/2402019.
17736	Stromgaard, P. Biomass, growth, and burning of woodland in a shifting cultivation area of South Central Africa. Forest Ecology and Management 1985, 12, 163–178, doi:10.1016/0378-1127(85)90089-1.
367	Treue, T.; Ngaga, Y.M.; Meilby, H.; Lund, J.F.; Kajembe, G.; Iddi, S.; Blomley, T.; Theilade, I.; Chamshama, S.A.O.; Skeie, K.; et al. Does participatory forest management promote sustainable forest utilisation in Tanzania? Int. Forest. Rev. 2014, 16, 23–38, doi:10.1505/146554814811031279.
3979	Walker, S.M.; Desanker, P.V. The impact of land use on soil carbon in Miombo Woodlands of Malawi. Forest Ecology and Management 2004, 203, 345–360, doi:10.1016/j.foreco.2004.08.004.
2940	Williams, M.; Ryan, C.M.; Rees, R.M.; Sambane, E.; Fernando, J.; Grace, J. Carbon sequestration and biodiversity of re-growing miombo woodlands in Mozambique. Forest Ecology and Management 2008, 254, 145–155, doi:10.1016/j.foreco.2007.07.033.
138	Winowiecki, L.; Vågen, T.-G.; Huising, J. Effects of land cover on ecosystem services in Tanzania: A spatial assessment of soil organic carbon. Geoderma 2016, 263, 274–283, doi:10.1016/j.geoderma.2015.03.010.
103	Woollen, E.; Ryan, C.M.; Williams, M. Carbon Stocks in an African Woodland Landscape: Spatial Distributions and Scales of Variation. Ecosystems 2012, 15, 804–818, doi:10.1007/s10021-012-9547-x.
53a	Zimudzi, C.; Chapano, C. Diversity, Population Structure, and Above Ground Biomass in Woody Species on Ngomakurira Mountain, Domboshawa, Zimbabwe. International Journal of Biodiversity 2016, 2016, 1–11, doi:10.1155/2016/4909158.
